# Supplementary material for: Large-scale transcriptional profiling of lignified tissues in Tectona grandis
Source: PubMed Central journal article supplement (PMC4570228; doi:10.1186/s12870-015-0599-x), 2015-09-15

Additional File 11. Other relevant differentially expressed genes from secondary xylem. We chose other genes with the highest expression between young (12-years-old) and mature (60-years-old) trees, and performed a transformation of root square in order to visualize their values.

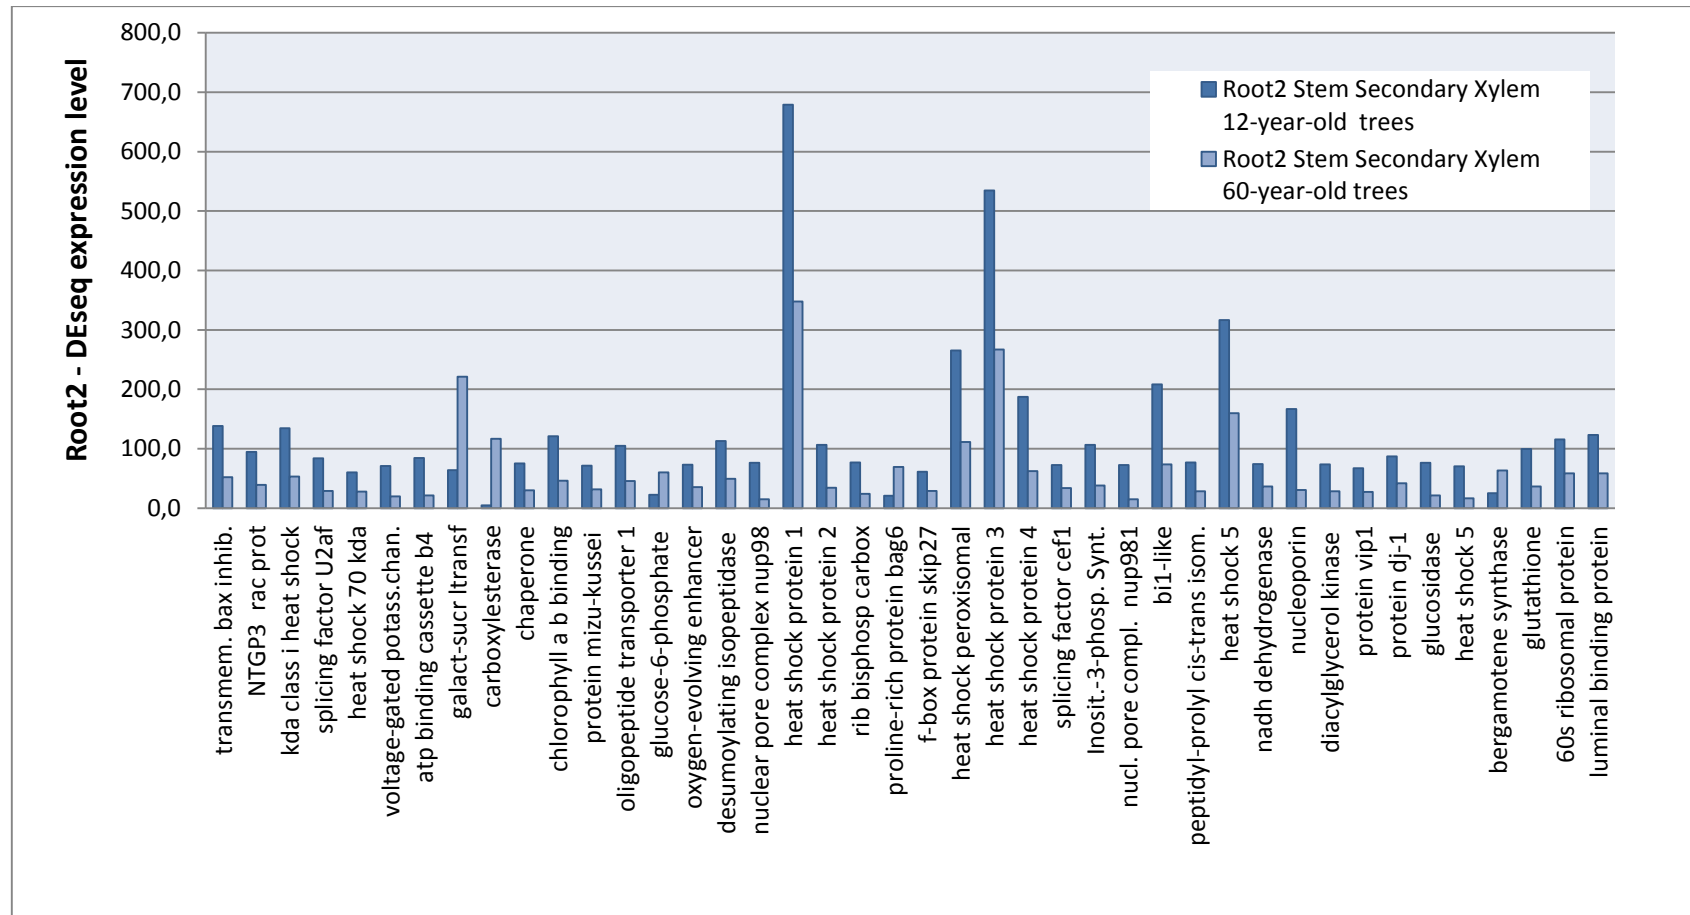

Supplement: 12870_2015_599_MOESM11_ESM.pdf [file 12870_2015_599_MOESM11_ESM.pdf]
